# Supplementary material for: Covid-19 in end-stage renal disease patients with renal replacement therapies: A systematic review and meta-analysis
Source: PubMed Central journal article supplement (PMC8232454; doi:10.1371/journal.pntd.0009156), 2021-06-15

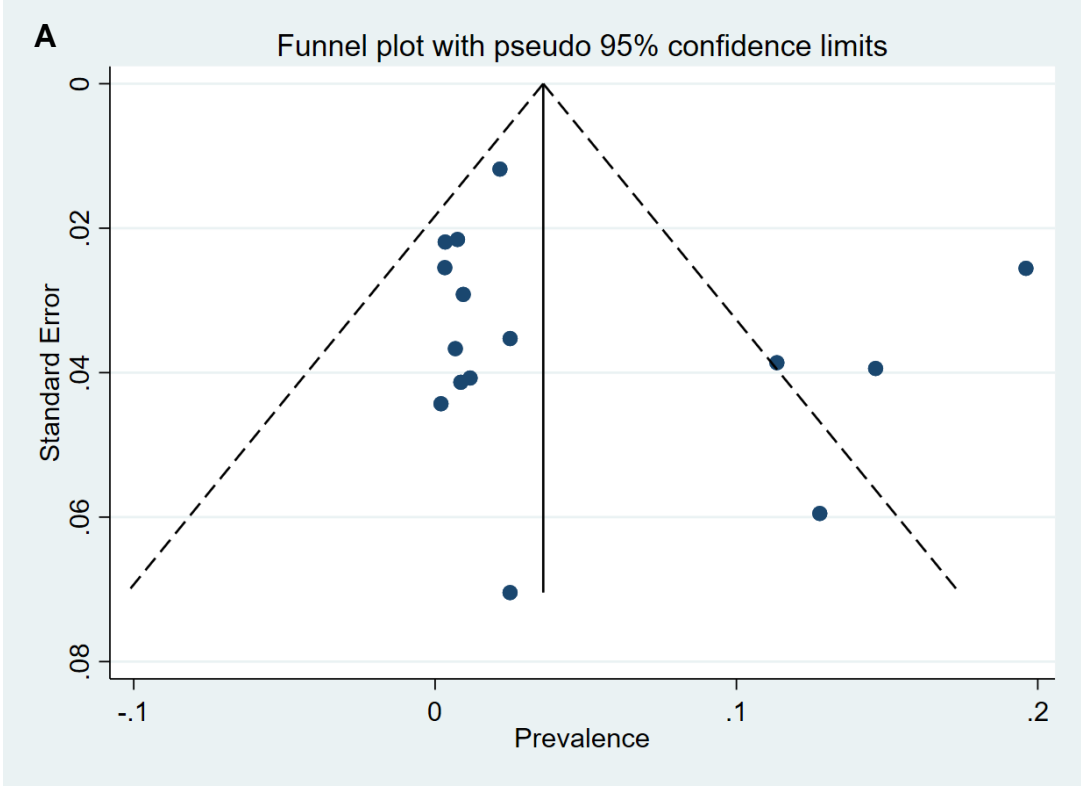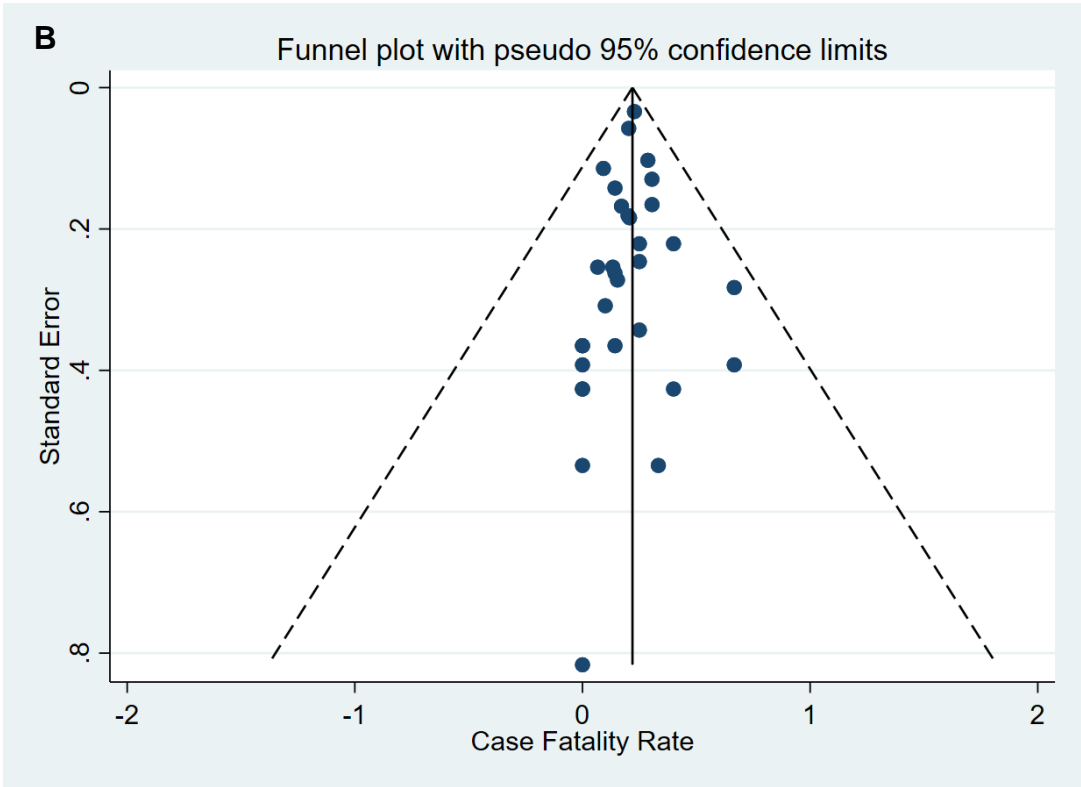

Supplement: pntd.0009156.s002.pdf [file pntd.0009156.s002.pdf]
