# Supplementary material for: Covid-19 in end-stage renal disease patients with renal replacement therapies: A systematic review and meta-analysis
Source: PubMed Central journal article supplement (PMC8232454; doi:10.1371/journal.pntd.0009156), 2021-06-15

**A** Mechanical Ventilation Rate of COVID-19 in Hospitalized ESRD Patients with Renal Replacement Therapy

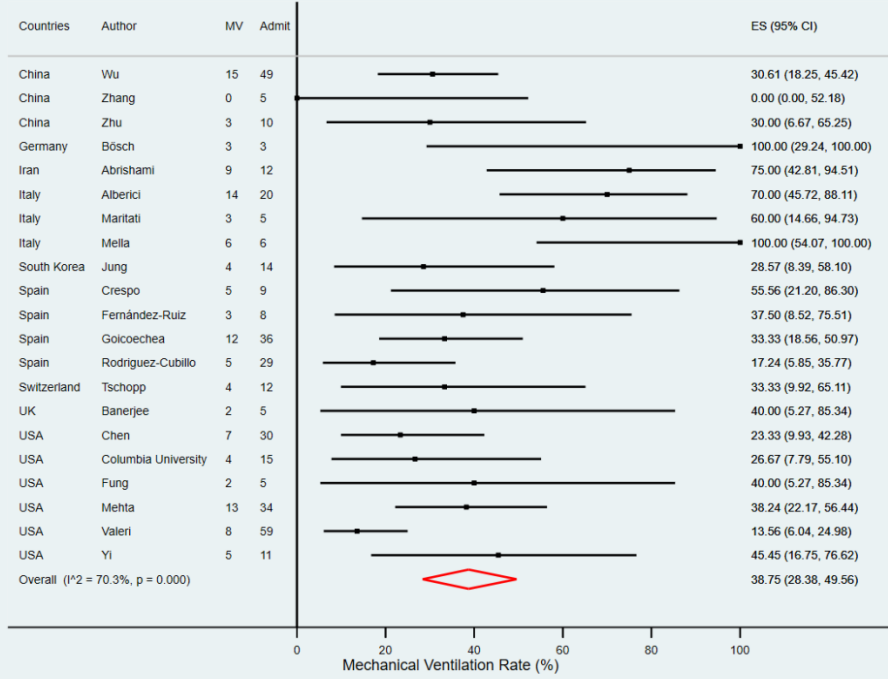

**B** Mechanical Ventilation Rate of COVID-19 in Hospitalized ESRD Patients with Renal Replacement Therapy by Country Income Level

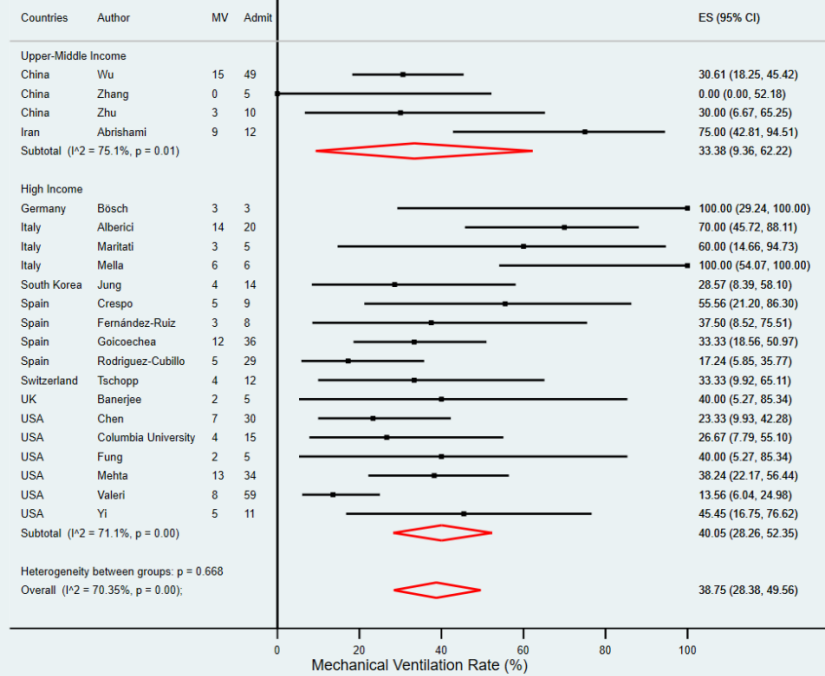

**C**

Mechanical Ventilation Rate of COVID-19 in Hospitalized ESRD Patients with Renal Replacement Therapy by WHO Country Region

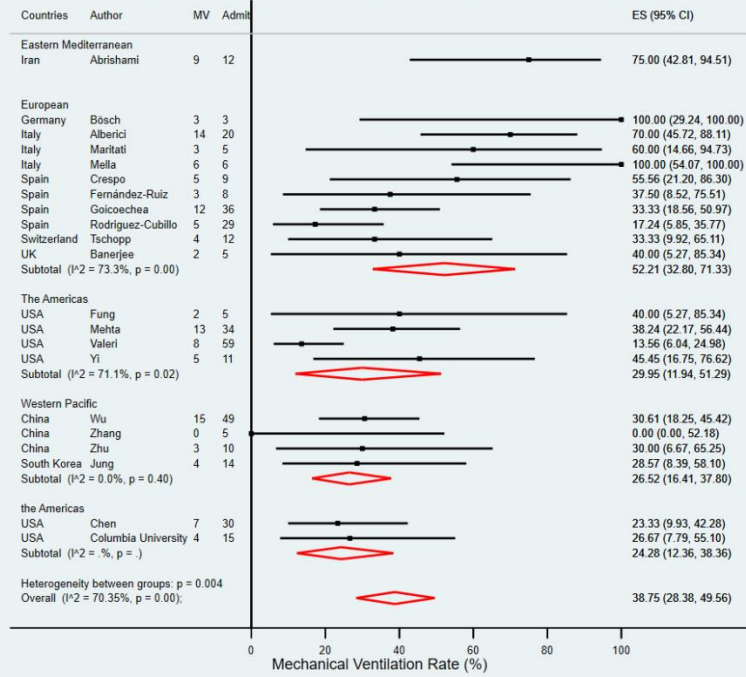

**D**

Mechanical Ventilation Rate of COVID-19 in Hospitalized ESRD Patients with Renal Replacement Therapy by RRT Modality

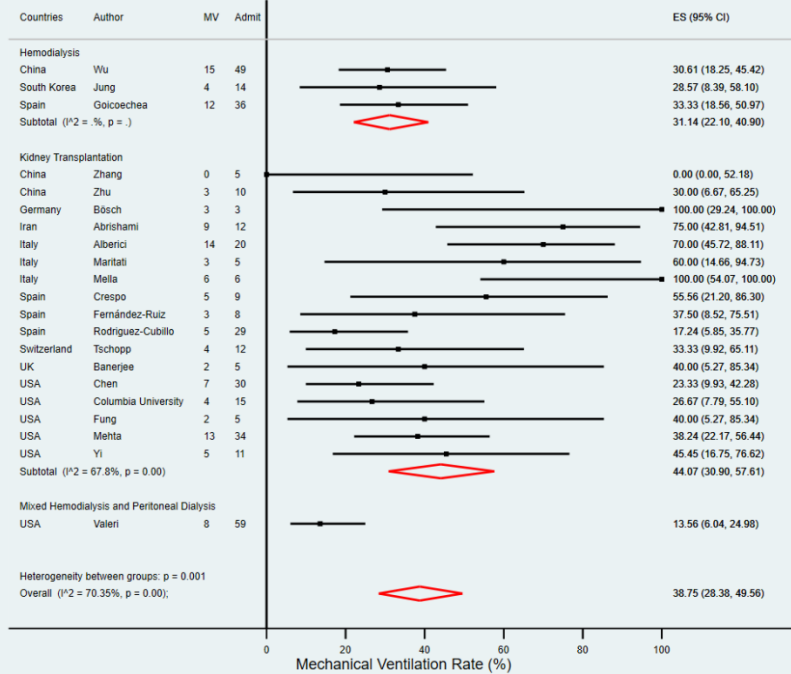

Supplement: pntd.0009156.s003.pdf [file pntd.0009156.s003.pdf]
