# Supplementary material for: Covid-19 in end-stage renal disease patients with renal replacement therapies: A systematic review and meta-analysis
Source: PubMed Central journal article supplement (PMC8232454; doi:10.1371/journal.pntd.0009156), 2021-06-15

ICU Admission Rate of COVID-19 in Hospitalized ESRD Patients with Renal Replacement Therapy

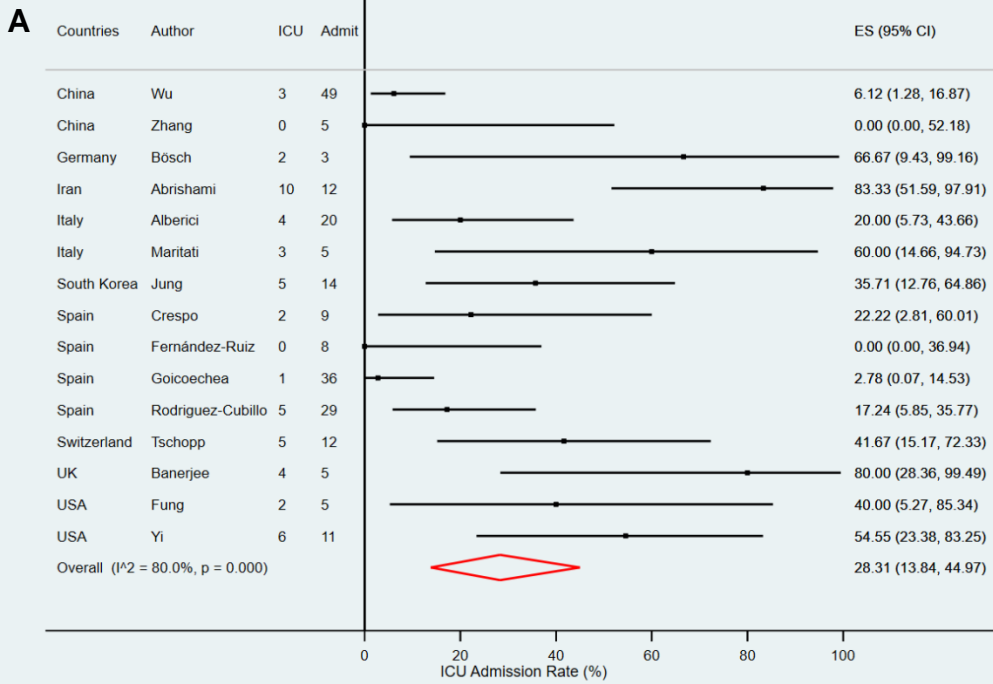

ICU Admission Rate of COVID-19 in Hospitalized ESRD Patients with Renal Replacement Therapy by Country Income Level

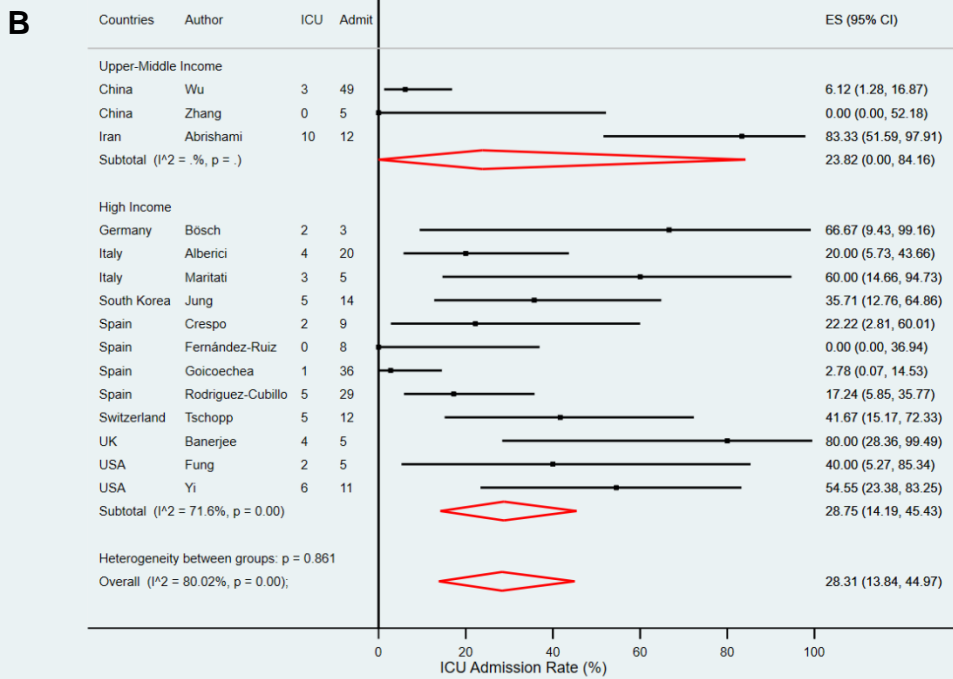

ICU Admission Rate of COVID-19 in Hospitalized ESRD Patients with Renal Replacement Therapy by WHO Country Region

C

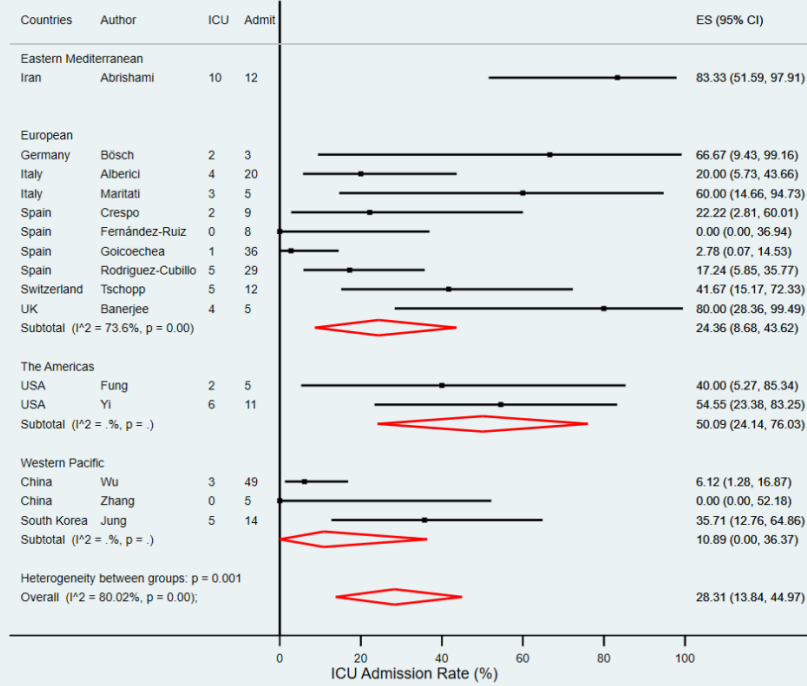

ICU Admission Rate of COVID-19 in Hospitalized ESRD Patients with Renal Replacement Therapy by RRT Modality

D

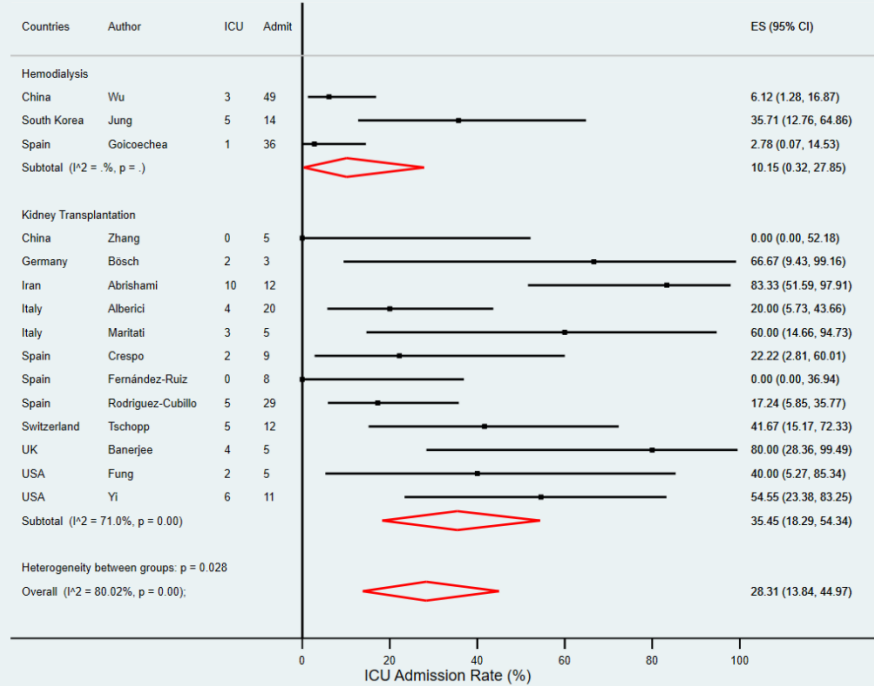

Supplement: pntd.0009156.s004.pdf [file pntd.0009156.s004.pdf]
